# Supplementary material for: Extracellular Protein Aggregates Colocalization and Neuronal Dystrophy in Comorbid Alzheimer’s and Creutzfeldt–Jakob Disease: A Micromorphological Pilot Study on 20 Brains
Source: MDPI journal article supplement (doi:10.3390/ijms22042099), 2021-02-20

## Supplementary Materials

Scheme of presumed seeding of PrP<sup>Sc</sup> in non-compact parts of A $\beta$  plaques in AD and CJD in comorbidity. It is hypothesized that the first step in the development of the compound A $\beta$  and PrP<sup>Sc</sup> plaques is formation of either cored or non-cored neuritic plaques where the compact parts are enriched by A $\beta_{40}$ , while non-compact parts with predominant A $\beta_{42}$ , is located mostly in the periphery. The second step is coaggregation of pathological PrP<sup>Sc</sup> not only, but mostly in the non-compact periphery of either cored or non-cored neuritic plaques. The scheme was composed using Servier Powerpoint Image Bank: <http://www.servier.com/>.

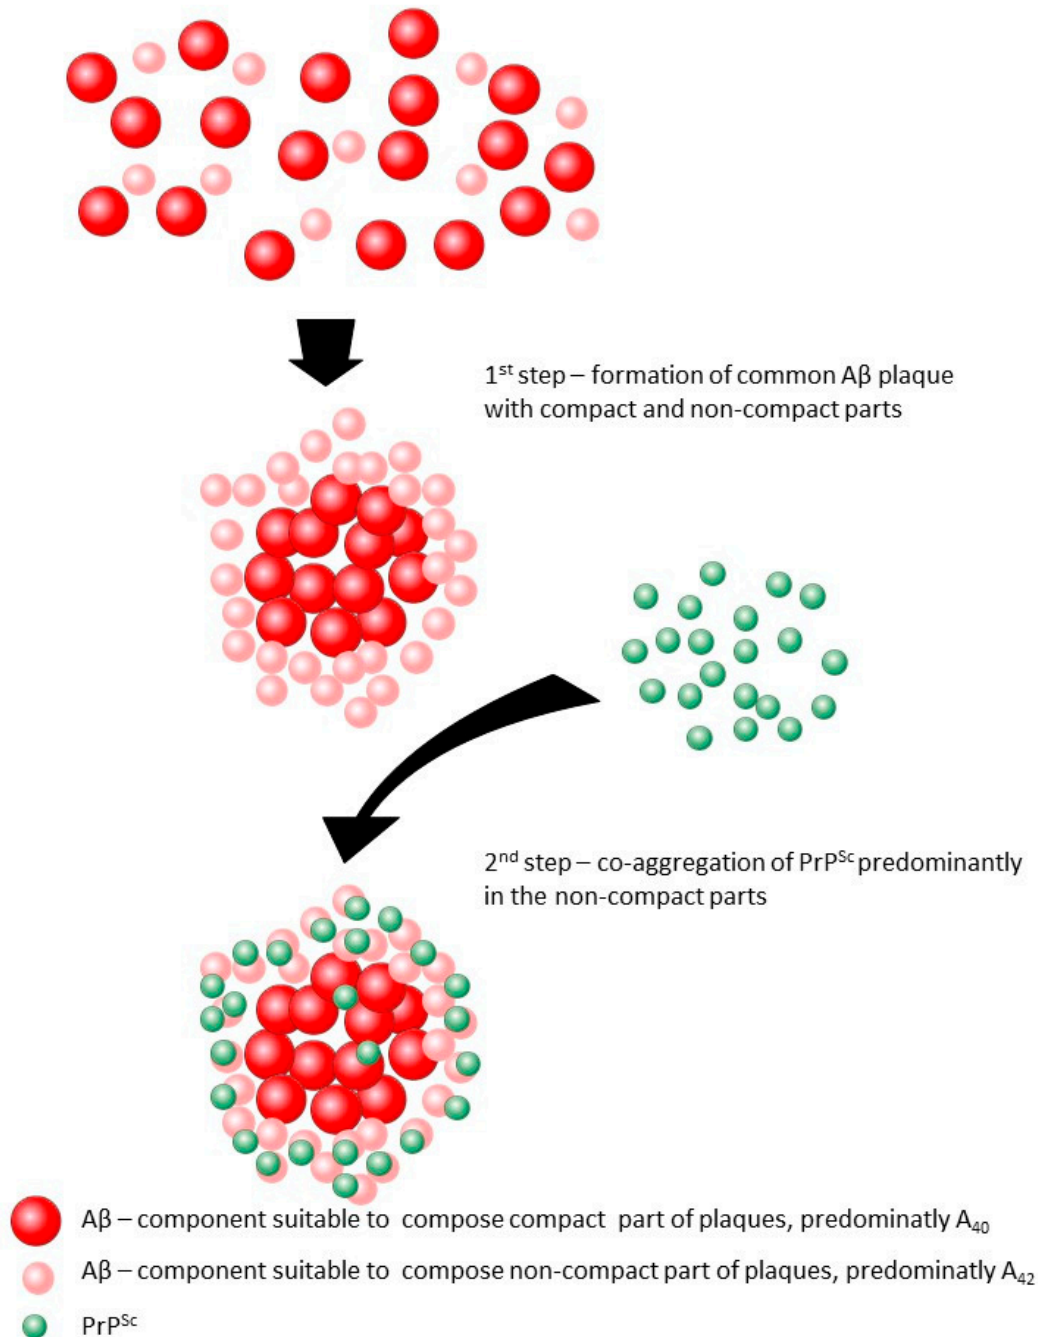

Supplement: s1 [file s1]
